# Supplementary material for: Once-weekly semaglutide for patients with type 2 diabetes: a cost-effectiveness analysis in the Netherlands
Source: PubMed Central journal article supplement — BMJ Open Diabetes Res Care. 2019 Oct 1;7(1):e000705. doi: 10.1136/bmjdrc-2019-000705 (PMC6777406; doi:10.1136/bmjdrc-2019-000705), 2019-10-01
Supplement: bmjdrc-2019-000705supp001.pdf [file bmjdrc-2019-000705supp001.pdf]

**SUPPLEMENTARY MATERIAL****Supplementary Table 1 Pharmacy costs used in the analyses**

| <b>Medication</b>                             | <b>Pack contents</b> | <b>Pack price (EUR)</b> |
|-----------------------------------------------|----------------------|-------------------------|
| Once-weekly semaglutide 0.5 mg                | 2 mg                 | 104.03                  |
| Once-weekly semaglutide 1 mg                  | 4 mg                 | 104.03                  |
| Dulaglutide 0.75 mg                           | 3 mg                 | 92.64                   |
| Dulaglutide 1.5 mg                            | 6 mg                 | 90.45                   |
| Insulin glargine (Lantus Solostar)            | 1,500 IU             | 45.01                   |
| Metformin                                     | 45,000 mg            | 1.23                    |
| Gliclazide                                    | 1,800 mg             | 4.83                    |
| Needles (b-d microfine + pentip 5mm thinwall) | 100 needles          | 16,70                   |
| SMBG test strips (Glukotest teststrip)        | 50 test strips       | 4.88                    |
| SMBG lancets (One Touch ultra soft)           | 10 lancets           | 0.94                    |

EUR, 2017 euros; IU, international units; SMBG, self-monitoring of blood glucose.

**Supplementary Table 2 Cost of treating diabetes-related complications**

|                                               | <b>Cost (EUR)</b> | <b>Reference</b>           |
|-----------------------------------------------|-------------------|----------------------------|
| <b>Cardiovascular complications</b>           |                   |                            |
| Myocardial infarction year of the event       | 6,988             | 1,2,3,4,5,6,7,8,9          |
| Myocardial infarction subsequent years        | 1,176             | 5,6,7,8,9                  |
| Angina year of the event                      | 1,819             | 1,2,3,4,5,6,7,8,9,10,11,12 |
| Angina subsequent years                       | 358               | 5,6,7,8,9,10,11,12         |
| Congestive heart failure year of the event    | 7,314             | 4,8,13,14                  |
| Congestive heart failure subsequent years     | 1,286             | 4,8,14                     |
| Stroke year of the event                      | 23,505            | 2,4,9,15,16,17             |
| Stroke subsequent years                       | 11,625            | 2,4,9,15,16,17             |
| Stroke death within 30 days                   | 4,943             | 2,4,9,15,16,17             |
| Peripheral vascular disease year of the event | 4,919             | 4,6,8,9,18,19,20           |
| Peripheral vascular disease subsequent years  | 107               | 8,9,18                     |
| <b>Renal complications</b>                    |                   |                            |
| Haemodialysis year of the event               | 78,942            | 8,21                       |
| Haemodialysis subsequent years                | 78,942            | 8,21                       |
| Peritoneal dialysis year of the event         | 75,373            | 8,21                       |
| Peritoneal dialysis subsequent years          | 75,373            | 8,21                       |
| Renal transplant year of the event            | 33,402            | 8,21                       |
| Renal transplant subsequent years             | 4,056             | 8,21                       |
| <b>Hypoglycaemic events</b>                   |                   |                            |
| Non-severe hypoglycaemic event                | 1                 | 22                         |
| Severe hypoglycaemic event                    | 486               | 22                         |
| <b>Ophthalmic complications</b>               |                   |                            |
| Laser treatment                               | 561               | 21                         |
| Cataract operation year of the event          | 1,444             | 8,21,23,24                 |
| Cataract operation subsequent years           | 0                 | Assumed                    |
| Blindness                                     | 3,766             | 4,25,26                    |

|                                                       | <b>Cost (EUR)</b> | <b>Reference</b> |
|-------------------------------------------------------|-------------------|------------------|
| <b>Ulcer, amputation and neuropathy complications</b> |                   |                  |
| Neuropathy year of the event                          | 0                 | Assumed          |
| Neuropathy subsequent years                           | 0                 | Assumed          |
| Amputation                                            | 14,610            | 4,21,27          |
| Prosthesis                                            | 4,574             | 4,28,29          |
| Gangrene treatment                                    | 3,195             | 30               |
| Healed ulcer                                          | 201               | 4,31             |
| Infected ulcer                                        | 2,454             | 30               |
| Uninfected ulcer treatment                            | 1,460             | 30               |

EUR, 2017 euros.

**Supplementary Table 3** Once-weekly semaglutide 0.5 mg versus insulin glargine: Sensitivity analysis results

|                                                                                                                                     | <b>Difference in quality-adjusted life expectancy (QALYs)</b> | <b>Difference in direct costs (EUR)</b> | <b>Difference in combined costs (EUR)</b> | <b>ICER based on direct costs (EUR per QALY gained)</b>   | <b>ICER based on combined costs (EUR per QALY gained)</b> |
|-------------------------------------------------------------------------------------------------------------------------------------|---------------------------------------------------------------|-----------------------------------------|-------------------------------------------|-----------------------------------------------------------|-----------------------------------------------------------|
| Base case                                                                                                                           | +0.19                                                         | +2,152                                  | +949                                      | 11,310                                                    | 4,988                                                     |
| 30 year time horizon                                                                                                                | +0.16                                                         | +2,233                                  | +1,167                                    | 13,688                                                    | 7,157                                                     |
| 0% discount rates                                                                                                                   | +0.24                                                         | +2,377                                  | +914                                      | 9,726                                                     | 3,741                                                     |
| HbA1c difference only                                                                                                               | +0.08                                                         | +2,383                                  | +1,612                                    | 31,556                                                    | 21,350                                                    |
| Blood pressure difference only                                                                                                      | +0.02                                                         | +2,438                                  | +2,150                                    | 104,639                                                   | 92,291                                                    |
| Lipid difference only                                                                                                               | +0.01                                                         | +2,443                                  | +2,410                                    | 277,640                                                   | 273,845                                                   |
| BMI difference only                                                                                                                 | +0.06                                                         | +2,513                                  | +2,482                                    | 41,741                                                    | 41,223                                                    |
| Hypoglycaemia difference only                                                                                                       | 0.00                                                          | +2,631                                  | +2,620                                    | Once-weekly semaglutide equally effective but more costly | Once-weekly semaglutide equally effective but more costly |
| Include only significantly different treatment effects (HbA1c, systolic blood pressure, total cholesterol, LDL cholesterol and BMI) | +0.18                                                         | +2,125                                  | +1,034                                    | 11,992                                                    | 5,836                                                     |
| UKPDS progression for HbA1c with no changes on treatment switch                                                                     | +0.18                                                         | +2,128                                  | +1,000                                    | 11,630                                                    | 5,466                                                     |

|                                                                                  | <b>Difference in quality-adjusted life expectancy (QALYs)</b> | <b>Difference in direct costs (EUR)</b> | <b>Difference in combined costs (EUR)</b> | <b>ICER based on direct costs (EUR per QALY gained)</b> | <b>ICER based on combined costs (EUR per QALY gained)</b> |
|----------------------------------------------------------------------------------|---------------------------------------------------------------|-----------------------------------------|-------------------------------------------|---------------------------------------------------------|-----------------------------------------------------------|
| Upper 95% CI of HbA1c estimated treatment difference                             | +0.19                                                         | +2,050                                  | +678                                      | 10,574                                                  | 3,495                                                     |
| Lower 95% CI of HbA1c estimated treatment difference                             | +0.18                                                         | +2,300                                  | +1,384                                    | 12,772                                                  | 7,684                                                     |
| Upper 95% CI of BMI estimated treatment difference                               | +0.21                                                         | +2,150                                  | +877                                      | 10,435                                                  | 4,259                                                     |
| Lower 95% CI of BMI estimated treatment difference                               | +0.19                                                         | +2,128                                  | +944                                      | 11,325                                                  | 5,023                                                     |
| Treatment switching at 2 years in all arms                                       | +0.17                                                         | +1,299                                  | +440                                      | 7,647                                                   | 2,587                                                     |
| Treatment switching at 5 years in all arms                                       | +0.22                                                         | +3,443                                  | +1,865                                    | 15,432                                                  | 8,360                                                     |
| Treatment switching at 7.5% HbA1c threshold (including use of UKPDS progression) | +0.21                                                         | +1,910                                  | +706                                      | 9,242                                                   | 3,417                                                     |
| Cost of complications +10%                                                       | +0.19                                                         | +2,105                                  | +800                                      | 11,063                                                  | 4,203                                                     |
| Cost of complications -10%                                                       | +0.19                                                         | +2,199                                  | +1,110                                    | 11,557                                                  | 5,833                                                     |
| UKPDS 82 risk equations applied                                                  | +0.11                                                         | +2,158                                  | +1,314                                    | 20,166                                                  | 12,280                                                    |

|                                          | <b>Difference in quality-adjusted life expectancy (QALYs)</b> | <b>Difference in direct costs (EUR)</b> | <b>Difference in combined costs (EUR)</b> | <b>ICER based on direct costs (EUR per QALY gained)</b> | <b>ICER based on combined costs (EUR per QALY gained)</b> |
|------------------------------------------|---------------------------------------------------------------|-----------------------------------------|-------------------------------------------|---------------------------------------------------------|-----------------------------------------------------------|
| Lee et al. BMI disutility applied        | +0.20                                                         | +2,152                                  | +949                                      | 10,639                                                  | 4,692                                                     |
| Utilities converted to Dutch values      | +0.20                                                         | +2,152                                  | +949                                      | 10,931                                                  | 4,821                                                     |
| Utilities +10%                           | +0.21                                                         | +2,152                                  | +949                                      | 10,367                                                  | 4,572                                                     |
| Utilities -10%                           | +0.17                                                         | +2,152                                  | +949                                      | 12,427                                                  | 5,480                                                     |
| Currie et al. hypoglycaemia disutilities | +0.19                                                         | +2,152                                  | +949                                      | 11,269                                                  | 4,969                                                     |
| Probabilistic sensitivity analysis       | +0.19                                                         | +2,151                                  | +1,295                                    | 11,453                                                  | 6,894                                                     |

BMI, body mass index; EUR, 2017 euros; HbA1c, glyated haemoglobin; ICER, incremental cost-effectiveness ratio; LDL, low-density lipoprotein; QALY, quality-adjusted life year;

UKPDS, United Kingdom Prospective Diabetes Study.

**Supplementary Table 4** Once-weekly semaglutide 1 mg versus insulin glargine: Sensitivity analysis results

|                                                                                                                                                    | <b>Difference in quality-adjusted life expectancy (QALYs)</b> | <b>Difference in direct costs (EUR)</b> | <b>Difference in combined costs (EUR)</b> | <b>ICER based on direct costs (EUR per QALY gained)</b>   | <b>ICER based on combined costs (EUR per QALY gained)</b> |
|----------------------------------------------------------------------------------------------------------------------------------------------------|---------------------------------------------------------------|-----------------------------------------|-------------------------------------------|-----------------------------------------------------------|-----------------------------------------------------------|
| Base case                                                                                                                                          | +0.27                                                         | +2,027                                  | +133                                      | 7,515                                                     | 495                                                       |
| 30 year time horizon                                                                                                                               | +0.25                                                         | +1,958                                  | +159                                      | 8,002                                                     | 651                                                       |
| 0% discount rates                                                                                                                                  | +0.35                                                         | +2,194                                  | -111                                      | 6,266                                                     | Once-weekly semaglutide dominant                          |
| HbA1c difference only                                                                                                                              | +0.11                                                         | +2,187                                  | +675                                      | 19,163                                                    | 5,915                                                     |
| Blood pressure difference only                                                                                                                     | +0.02                                                         | +2,476                                  | +2,211                                    | 103,595                                                   | 92,490                                                    |
| Lipid difference only                                                                                                                              | +0.06                                                         | +2,489                                  | +2,364                                    | 42,404                                                    | 40,277                                                    |
| BMI difference only                                                                                                                                | +0.09                                                         | +2,626                                  | +2,562                                    | 29,575                                                    | 28,851                                                    |
| Hypoglycaemia difference only                                                                                                                      | 0.00                                                          | +2,637                                  | +2,668                                    | Once-weekly semaglutide equally effective but more costly | Once-weekly semaglutide equally effective but more costly |
| Include only significantly different treatment effects (HbA1c, systolic blood pressure, total cholesterol, LDL cholesterol, triglycerides and BMI) | +0.29                                                         | +2,050                                  | +167                                      | 7,000                                                     | 571                                                       |

|                                                                                  | <b>Difference in quality-adjusted life expectancy (QALYs)</b> | <b>Difference in direct costs (EUR)</b> | <b>Difference in combined costs (EUR)</b> | <b>ICER based on direct costs (EUR per QALY gained)</b> | <b>ICER based on combined costs (EUR per QALY gained)</b> |
|----------------------------------------------------------------------------------|---------------------------------------------------------------|-----------------------------------------|-------------------------------------------|---------------------------------------------------------|-----------------------------------------------------------|
| UKPDS progression for HbA1c with no changes on treatment switch                  | +0.29                                                         | +1,944                                  | -135                                      | 6,791                                                   | Once-weekly semaglutide dominant                          |
| Upper 95% CI of HbA1c estimated treatment difference                             | +0.30                                                         | +1,994                                  | -118                                      | 6,554                                                   | Once-weekly semaglutide dominant                          |
| Lower 95% CI of HbA1c estimated treatment difference                             | +0.27                                                         | +2,077                                  | +297                                      | 7,576                                                   | 1,084                                                     |
| Upper 95% CI of BMI estimated treatment difference                               | +0.29                                                         | +2,048                                  | +181                                      | 7,105                                                   | 628                                                       |
| Lower 95% CI of BMI estimated treatment difference                               | +0.26                                                         | +2,080                                  | +201                                      | 8,035                                                   | 774                                                       |
| Treatment switching at 2 years in all arms                                       | +0.24                                                         | +1,393                                  | -296                                      | 5,698                                                   | Once-weekly semaglutide dominant                          |
| Treatment switching at 5 years in all arms                                       | +0.37                                                         | +3,161                                  | +923                                      | 8,631                                                   | 2,519                                                     |
| Treatment switching at 7.5% HbA1c threshold (including use of UKPDS progression) | +0.35                                                         | +2,191                                  | +10                                       | 6,356                                                   | 30                                                        |



|                                          | <b>Difference in quality-adjusted life expectancy (QALYs)</b> | <b>Difference in direct costs (EUR)</b> | <b>Difference in combined costs (EUR)</b> | <b>ICER based on direct costs (EUR per QALY gained)</b> | <b>ICER based on combined costs (EUR per QALY gained)</b> |
|------------------------------------------|---------------------------------------------------------------|-----------------------------------------|-------------------------------------------|---------------------------------------------------------|-----------------------------------------------------------|
| Cost of complications +10%               | +0.27                                                         | +1,964                                  | -101                                      | 7,281                                                   | Once-weekly semaglutide dominant                          |
| Cost of complications -10%               | +0.27                                                         | +2,090                                  | +378                                      | 7,750                                                   | 1,401                                                     |
| UKPDS 82 risk equations applied          | +0.17                                                         | +1,989                                  | +540                                      | 11,888                                                  | 3,226                                                     |
| Lee et al. BMI disutility applied        | +0.29                                                         | +2,027                                  | +133                                      | 6,925                                                   | 456                                                       |
| Utilities converted to Dutch values      | +0.28                                                         | +2,027                                  | +133                                      | 7,265                                                   | 478                                                       |
| Utilities +10%                           | +0.30                                                         | +2,027                                  | +133                                      | 6,857                                                   | 451                                                       |
| Utilities -10%                           | +0.24                                                         | +2,027                                  | +133                                      | 8,297                                                   | 546                                                       |
| Currie et al. hypoglycaemia disutilities | +0.28                                                         | +2,027                                  | +133                                      | 7,368                                                   | 485                                                       |
| Probabilistic sensitivity analysis       | +0.28                                                         | +2,056                                  | +570                                      | 7,239                                                   | 2,007                                                     |

BMI, body mass index; EUR, 2017 euros; HbA1c, glycated haemoglobin; ICER, incremental cost-effectiveness ratio; LDL, low-density lipoprotein; QALY, quality-adjusted life year;

UKPDS, United Kingdom Prospective Diabetes Study.

**Supplementary Table 5** Once-weekly semaglutide 0.5 mg versus dulaglutide 0.75 mg: Sensitivity analysis results

|                                                                        | <b>Difference in quality-adjusted life expectancy (QALYs)</b> | <b>Difference in direct costs (EUR)</b> | <b>Difference in combined costs (EUR)</b> | <b>ICER based on direct costs (EUR per QALY gained)</b>   | <b>ICER based on combined costs (EUR per QALY gained)</b> |
|------------------------------------------------------------------------|---------------------------------------------------------------|-----------------------------------------|-------------------------------------------|-----------------------------------------------------------|-----------------------------------------------------------|
| Base case                                                              | +0.07                                                         | +314                                    | -446                                      | 4,671                                                     | Once-weekly semaglutide dominant                          |
| 30 year time horizon                                                   | +0.08                                                         | +313                                    | -504                                      | 3,877                                                     | Once-weekly semaglutide dominant                          |
| 0% discount rates                                                      | +0.08                                                         | +367                                    | -554                                      | 4,357                                                     | Once-weekly semaglutide dominant                          |
| HbA1c difference only                                                  | +0.04                                                         | +428                                    | -254                                      | 10,465                                                    | Once-weekly semaglutide dominant                          |
| Blood pressure difference only                                         | +0.01                                                         | +429                                    | +406                                      | 41,203                                                    | 39,050                                                    |
| Lipid difference only                                                  | -0.02                                                         | +406                                    | +393                                      | Once-weekly semaglutide dominated                         | Once-weekly semaglutide dominated                         |
| BMI difference only                                                    | +0.05                                                         | +489                                    | +408                                      | 10,288                                                    | 8,581                                                     |
| Hypoglycaemia difference only                                          | 0.00                                                          | +506                                    | +526                                      | Once-weekly semaglutide equally effective but more costly | Once-weekly semaglutide equally effective but more costly |
| Include only significantly different treatment effects (HbA1c and BMI) | +0.08                                                         | +377                                    | -339                                      | 4,573                                                     | Once-weekly semaglutide dominant                          |

|                                                                                  | <b>Difference in quality-adjusted life expectancy (QALYs)</b> | <b>Difference in direct costs (EUR)</b> | <b>Difference in combined costs (EUR)</b> | <b>ICER based on direct costs (EUR per QALY gained)</b> | <b>ICER based on combined costs (EUR per QALY gained)</b> |
|----------------------------------------------------------------------------------|---------------------------------------------------------------|-----------------------------------------|-------------------------------------------|---------------------------------------------------------|-----------------------------------------------------------|
| UKPDS progression for HbA1c with no changes on treatment switch                  | +0.11                                                         | +355                                    | -589                                      | 3,276                                                   | Once-weekly semaglutide dominant                          |
| Upper 95% CI of HbA1c estimated treatment difference                             | +0.09                                                         | +358                                    | -616                                      | 4,104                                                   | Once-weekly semaglutide dominant                          |
| Lower 95% CI of HbA1c estimated treatment difference                             | +0.05                                                         | +373                                    | -13                                       | 7,366                                                   | Once-weekly semaglutide dominant                          |
| Upper 95% CI of BMI estimated treatment difference                               | +0.09                                                         | +288                                    | -467                                      | 3,239                                                   | Once-weekly semaglutide dominant                          |
| Lower 95% CI of BMI estimated treatment difference                               | +0.06                                                         | +287                                    | -400                                      | 4,811                                                   | Once-weekly semaglutide dominant                          |
| Treatment switching at 2 years in all arms                                       | +0.05                                                         | +194                                    | -382                                      | 4,064                                                   | Once-weekly semaglutide dominant                          |
| Treatment switching at 5 years in all arms                                       | +0.14                                                         | +371                                    | -708                                      | 2,613                                                   | Once-weekly semaglutide dominant                          |
| Treatment switching at 7.5% HbA1c threshold (including use of UKPDS progression) | +0.11                                                         | +355                                    | -589                                      | 3,276                                                   | Once-weekly semaglutide dominant                          |

|                                          | <b>Difference in quality-adjusted life expectancy (QALYs)</b> | <b>Difference in direct costs (EUR)</b> | <b>Difference in combined costs (EUR)</b> | <b>ICER based on direct costs (EUR per QALY gained)</b> | <b>ICER based on combined costs (EUR per QALY gained)</b> |
|------------------------------------------|---------------------------------------------------------------|-----------------------------------------|-------------------------------------------|---------------------------------------------------------|-----------------------------------------------------------|
| Cost of complications +10%               | +0.07                                                         | +303                                    | -528                                      | 4,498                                                   | Once-weekly semaglutide dominant                          |
| Cost of complications -10%               | +0.07                                                         | +326                                    | -358                                      | 4,845                                                   | Once-weekly semaglutide dominant                          |
| UKPDS 82 risk equations applied          | +0.06                                                         | +13                                     | -704                                      | 231                                                     | Once-weekly semaglutide dominant                          |
| Lee et al. BMI disutility applied        | +0.08                                                         | +314                                    | -446                                      | 4,220                                                   | Once-weekly semaglutide dominant                          |
| Utilities converted to Dutch values      | +0.07                                                         | +314                                    | -446                                      | 4,692                                                   | Once-weekly semaglutide dominant                          |
| Utilities +10%                           | +0.07                                                         | +314                                    | -446                                      | 4,434                                                   | Once-weekly semaglutide dominant                          |
| Utilities -10%                           | +0.06                                                         | +314                                    | -446                                      | 5,266                                                   | Once-weekly semaglutide dominant                          |
| Currie et al. hypoglycaemia disutilities | +0.07                                                         | +314                                    | -446                                      | 4,837                                                   | Once-weekly semaglutide dominant                          |
| Probabilistic sensitivity analysis       | +0.09                                                         | +162                                    | -404                                      | 1,717                                                   | Once-weekly semaglutide dominant                          |

BMI, body mass index; EUR, 2017 euros; HbA1c, glycated haemoglobin; ICER, incremental cost-effectiveness ratio; QALY, quality-adjusted life year; UKPDS, United Kingdom

Prospective Diabetes Study.

**Supplementary Table 6** Once-weekly semaglutide 1 mg versus dulaglutide 1.5 mg: Sensitivity analysis results

|                                                                        | <b>Difference in quality-adjusted life expectancy (QALYs)</b> | <b>Difference in direct costs (EUR)</b> | <b>Difference in combined costs (EUR)</b> | <b>ICER based on direct costs (EUR per QALY gained)</b>   | <b>ICER based on combined costs (EUR per QALY gained)</b> |
|------------------------------------------------------------------------|---------------------------------------------------------------|-----------------------------------------|-------------------------------------------|-----------------------------------------------------------|-----------------------------------------------------------|
| Base case                                                              | +0.13                                                         | +381                                    | -455                                      | 2,861                                                     | Once-weekly semaglutide dominant                          |
| 30 year time horizon                                                   | +0.12                                                         | +103                                    | -786                                      | 870                                                       | Once-weekly semaglutide dominant                          |
| 0% discount rates                                                      | +0.17                                                         | +515                                    | -507                                      | 2,956                                                     | Once-weekly semaglutide dominant                          |
| HbA1c difference only                                                  | +0.05                                                         | +393                                    | -258                                      | 8,304                                                     | Once-weekly semaglutide dominant                          |
| Blood pressure difference only                                         | +0.02                                                         | +556                                    | +430                                      | 31,577                                                    | 24,446                                                    |
| Lipid difference only                                                  | +0.02                                                         | +631                                    | +667                                      | 33,579                                                    | 35,486                                                    |
| BMI difference only                                                    | +0.06                                                         | +637                                    | +626                                      | 11,623                                                    | 11,425                                                    |
| Hypoglycaemia difference only                                          | 0.00                                                          | +575                                    | +602                                      | Once-weekly Semaglutide equally effective but more costly | Once-weekly Semaglutide equally effective but more costly |
| Include only significantly different treatment effects (HbA1c and BMI) | +0.11                                                         | +535                                    | -108                                      | 4,705                                                     | Once-weekly semaglutide dominant                          |

|                                                                                  | <b>Difference in quality-adjusted life expectancy (QALYs)</b> | <b>Difference in direct costs (EUR)</b> | <b>Difference in combined costs (EUR)</b> | <b>ICER based on direct costs (EUR per QALY gained)</b> | <b>ICER based on combined costs (EUR per QALY gained)</b> |
|----------------------------------------------------------------------------------|---------------------------------------------------------------|-----------------------------------------|-------------------------------------------|---------------------------------------------------------|-----------------------------------------------------------|
| UKPDS progression for HbA1c with no changes on treatment switch                  | +0.15                                                         | +126                                    | -1,083                                    | 850                                                     | Once-weekly semaglutide dominant                          |
| Upper 95% CI of HbA1c estimated treatment difference                             | +0.15                                                         | +298                                    | -732                                      | 2,031                                                   | Once-weekly semaglutide dominant                          |
| Lower 95% CI of HbA1c estimated treatment difference                             | +0.12                                                         | +544                                    | +22                                       | 4,470                                                   | 178                                                       |
| Upper 95% CI of BMI estimated treatment difference                               | +0.15                                                         | +409                                    | -428                                      | 2,714                                                   | Once-weekly semaglutide dominant                          |
| Lower 95% CI of BMI estimated treatment difference                               | +0.12                                                         | +403                                    | -421                                      | 3,511                                                   | Once-weekly semaglutide dominant                          |
| Treatment switching at 2 years in all arms                                       | +0.08                                                         | +159                                    | -610                                      | 1,883                                                   | Once-weekly semaglutide dominant                          |
| Treatment switching at 5 years in all arms                                       | +0.15                                                         | +243                                    | -870                                      | 1,638                                                   | Once-weekly semaglutide dominant                          |
| Treatment switching at 7.5% HbA1c threshold (including use of UKPDS progression) | +0.18                                                         | +713                                    | -449                                      | 3,953                                                   | Once-weekly semaglutide dominant                          |

|                                          | <b>Difference in quality-adjusted life expectancy (QALYs)</b> | <b>Difference in direct costs (EUR)</b> | <b>Difference in combined costs (EUR)</b> | <b>ICER based on direct costs (EUR per QALY gained)</b> | <b>ICER based on combined costs (EUR per QALY gained)</b> |
|------------------------------------------|---------------------------------------------------------------|-----------------------------------------|-------------------------------------------|---------------------------------------------------------|-----------------------------------------------------------|
| Cost of complications +10%               | +0.13                                                         | +364                                    | -547                                      | 2,740                                                   | Once-weekly semaglutide dominant                          |
| Cost of complications -10%               | +0.13                                                         | +397                                    | -360                                      | 2,982                                                   | Once-weekly semaglutide dominant                          |
| UKPDS 82 risk equations applied          | +0.06                                                         | +332                                    | -225                                      | 5,749                                                   | Once-weekly semaglutide dominant                          |
| Lee et al. BMI disutility applied        | +0.14                                                         | +381                                    | -455                                      | 2,672                                                   | Once-weekly semaglutide dominant                          |
| Utilities converted to Dutch values      | +0.14                                                         | +381                                    | -455                                      | 2,767                                                   | Once-weekly semaglutide dominant                          |
| Utilities +10%                           | +0.15                                                         | +381                                    | -455                                      | 2,624                                                   | Once-weekly semaglutide dominant                          |
| Utilities -10%                           | +0.12                                                         | +381                                    | -455                                      | 3,140                                                   | Once-weekly semaglutide dominant                          |
| Currie et al. hypoglycaemia disutilities | +0.13                                                         | +381                                    | -455                                      | 2,855                                                   | Once-weekly semaglutide dominant                          |
| Probabilistic sensitivity analysis       | +0.12                                                         | +204                                    | -452                                      | 1,722                                                   | Once-weekly semaglutide dominant                          |

BMI, body mass index; EUR, 2017 euros; HbA1c, glycated haemoglobin; ICER, incremental cost-effectiveness ratio; QALY, quality-adjusted life year; UKPDS, United Kingdom

Prospective Diabetes Study.

### Supplementary Figure 1 Cost-effectiveness scatterplot for once-weekly semaglutide

#### 0.5 mg and 1 mg versus insulin glargine based on combined costs

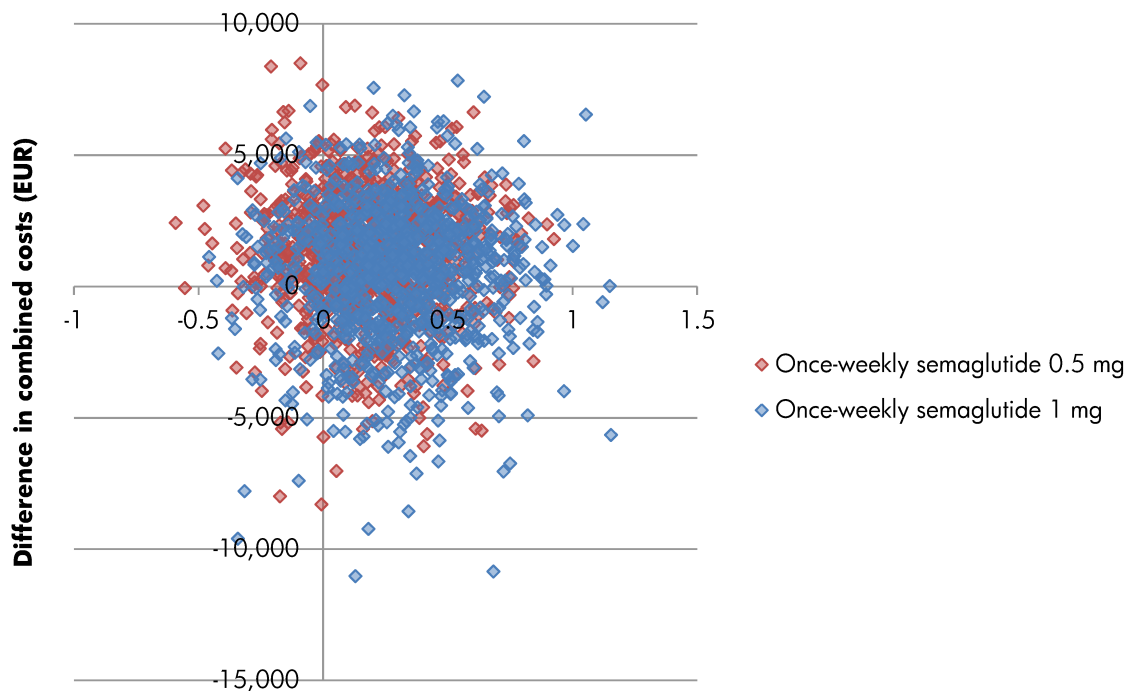

#### Difference in quality-adjusted life expectancy (QALYs)

EUR, 2017 euros; QALY, quality-adjusted life year. In the comparison of once-weekly semaglutide 0.5 mg with insulin glargine, 58% of points fell in the north-east quadrant (improved outcomes and increased costs), 20% in the south-east quadrant (improved outcomes and decreased costs), 5% in the south-west quadrant (poorer outcomes with decreased costs) and 17% in the north-west quadrant (poorer outcomes with increased costs). In the comparison of once-weekly semaglutide 1 mg with insulin glargine, 56% of points fell in the north-east quadrant (improved outcomes and increased costs), 31% in the south-east quadrant (improved outcomes and decreased costs), 4% in the south-west quadrant (poorer outcomes with decreased costs) and 9% in the north-west quadrant (poorer outcomes with increased costs).



**Supplementary Figure 2 Cost-effectiveness acceptability curve for once-weekly semaglutide 0.5 mg and 1 mg versus insulin glargine based on combined costs**

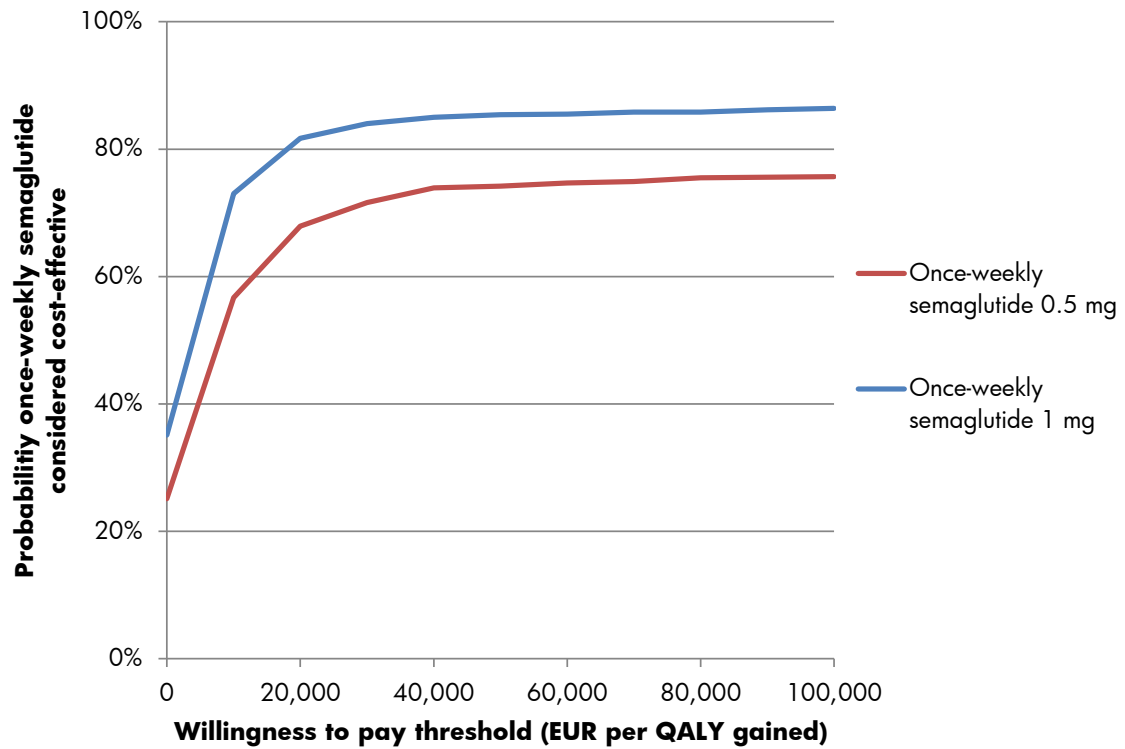

EUR, 2017 euros; QALY, quality-adjusted life year.

**Supplementary Figure 3 Cost-effectiveness scatterplot for once-weekly semaglutide****0.5 mg versus dulaglutide 0.75 mg based on combined costs**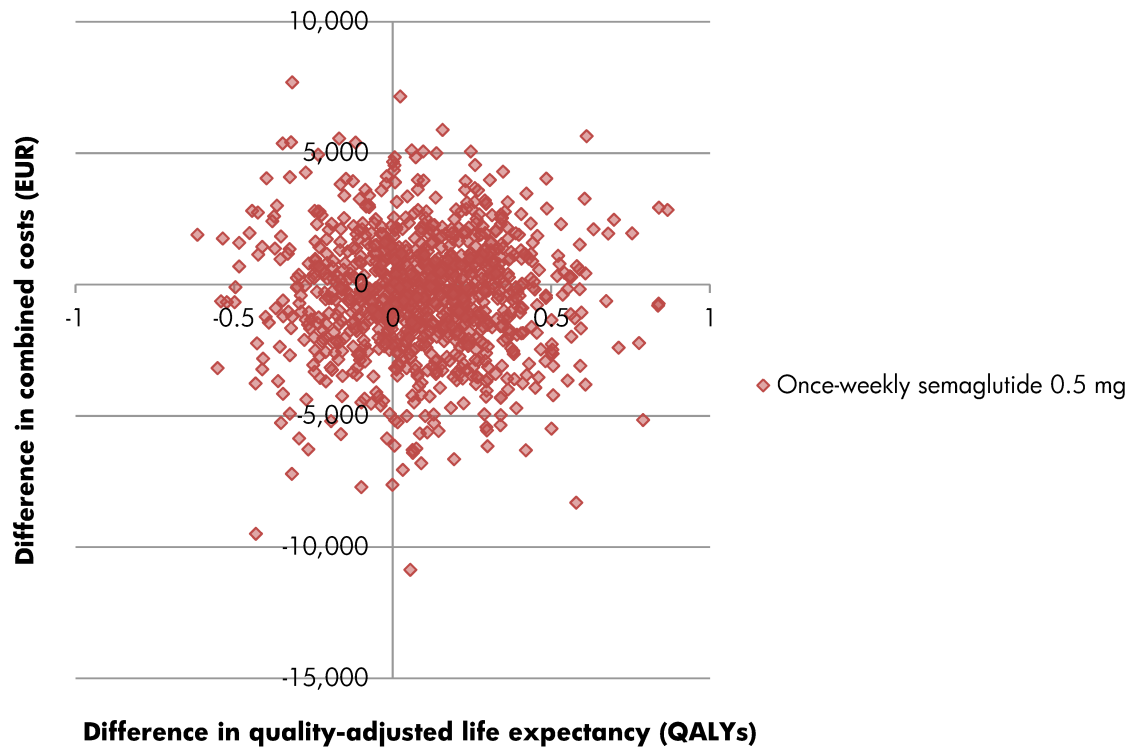

EUR, 2017 euros; QALY, quality-adjusted life year. In the comparison of once-weekly semaglutide 0.5 mg with dulaglutide 0.75 mg, 30% of points fell in the north-east quadrant (improved outcomes and increased costs), 37% in the south-east quadrant (improved outcomes and decreased costs), 19% in the south-west quadrant (poorer outcomes with decreased costs) and 14% in the north-west quadrant (poorer outcomes with increased costs).

**Supplementary Figure 4 Cost-effectiveness acceptability curve for once-weekly semaglutide 0.5 mg versus dulaglutide 0.75 mg based on combined costs**

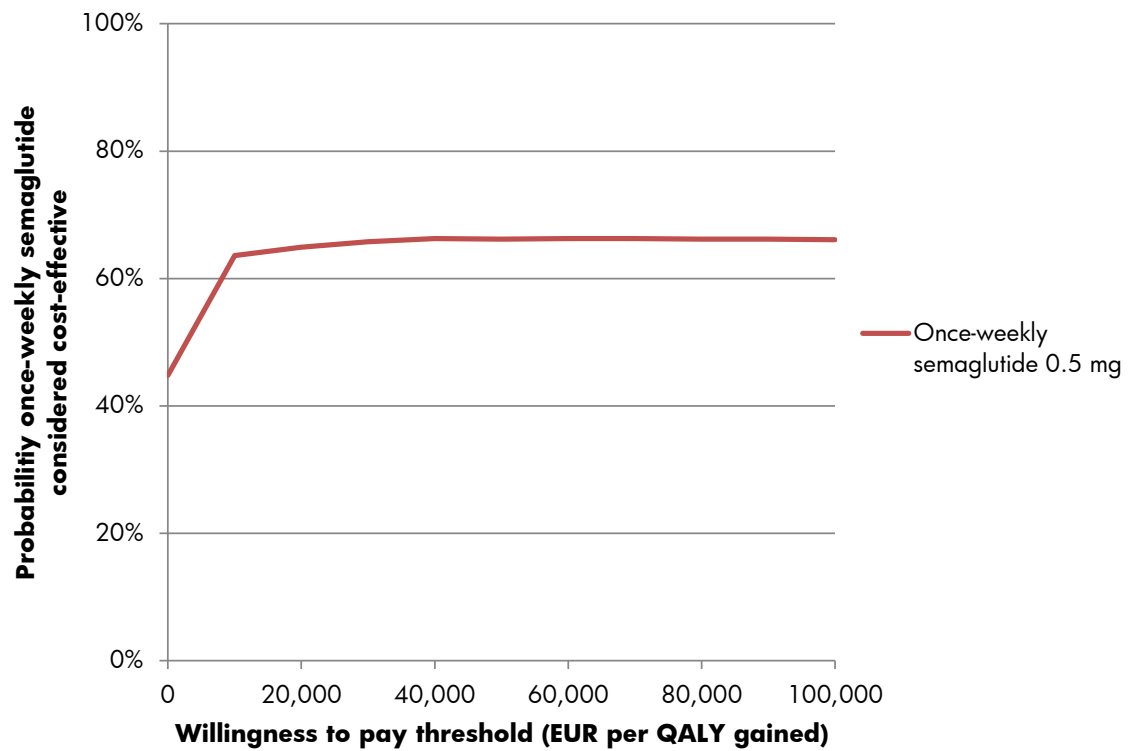

EUR, 2017 euros; QALY, quality-adjusted life year.

**Supplementary Figure 5 Cost-effectiveness scatterplot for once-weekly semaglutide****1 mg versus dulaglutide 1.5 mg based on combined costs**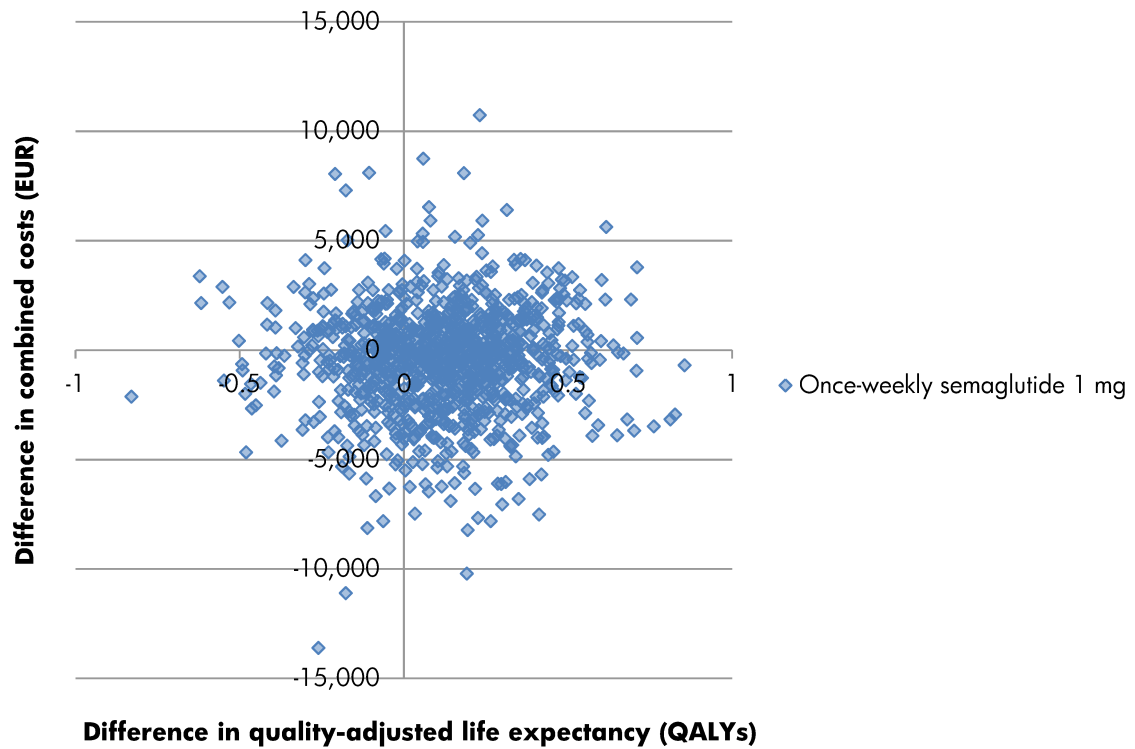

EUR, 2017 euros; QALY, quality-adjusted life year. In the comparison of once-weekly semaglutide 1 mg with dulaglutide 1.5 mg, 30% of points fell in the north-east quadrant (improved outcomes and increased costs), 40% in the south-east quadrant (improved outcomes and decreased costs), 17% in the south-west quadrant (poorer outcomes with decreased costs) and 13% in the north-west quadrant (poorer outcomes with increased costs).

**Supplementary Figure 6 Cost-effectiveness acceptability curve for once-weekly semaglutide 1 mg versus dulaglutide 1.5 mg based on combined costs**

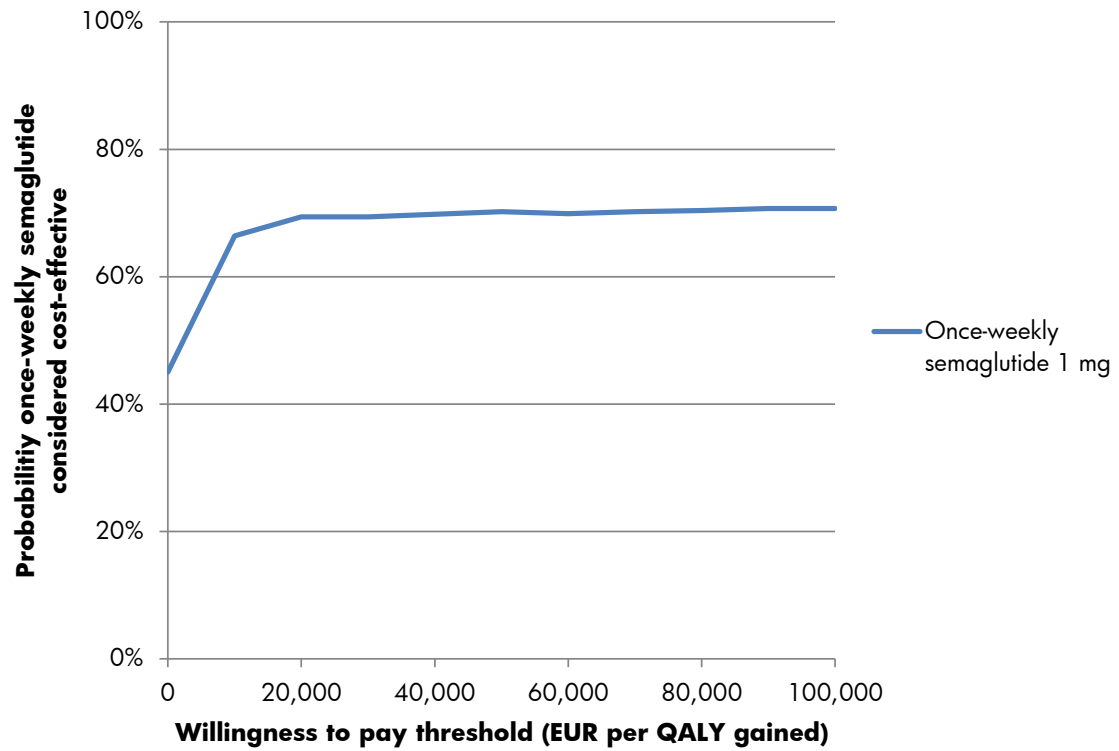

EUR, 2017 euros; QALY, quality-adjusted life year.

## REFERENCES

- <sup>1</sup> Soekhlal RR, Burgers LT, Redekop WK, Tan SS. Treatment costs of acute myocardial infarction in the Netherlands. *Neth Heart J*. 2013;21(5):230-5.
- <sup>2</sup> Nederlandse Zorgautoriteit (NZA) tariffs <https://zorgproducten.nza.nl>
- <sup>3</sup> Genders TS, Ferket BS, Dedic A, Galema TW, Mollet NR, de Feyter PJ, Fleischmann KE, Nieman K, Hunink MG. Coronary computed tomography versus exercise testing in patients with stable chest pain: comparative effectiveness and costs. *Int J Cardiol*. 2013;167(4):1268-75.
- <sup>4</sup> Hakkaart-van Roijen L, Van der Linden N, Bouwmans CAM, Kanters T, Tan SS. Costing manual: Methodology of costing research and reference prices for economic evaluations in healthcare [in Dutch: Kostenhandleiding: Methodologie van kostenonderzoek en referentieprijzen voor economische evaluaties in de gezondheidszorg]. 2015.
- <sup>5</sup> Hartstichting. 2018. Hart- en vaatziekten in Nederland 2017. Cijfers over leefstijl, risicofactoren, ziekte en sterfte.
- <sup>6</sup> Osnabrugge RL, Magnuson EA, Serruys PW, Campos CM, Wang K, van Klaveren D, Farooq V, Abdallah MS, Li H, Vilain KA, Steyerberg EW, Morice MC, Dawkins KD, Mohr FW, Kappetein AP, Cohen DJ; SYNTAX trial investigators. Cost-effectiveness of percutaneous coronary intervention versus bypass surgery from a Dutch perspective. *Heart*. 2015;101(24):1980-8.
- <sup>7</sup> Eindhoven DC, Hilt AD, Zwaan TC, SchaliJ MJ, Borleffs CJW. Age and gender differences in medical adherence after myocardial infarction: Women do not receive optimal treatment - The Netherlands claims database. *Eur J Prev Cardiol*. 2018;25(2):181-189.
- <sup>8</sup> Zorginstituut Nederland <https://www.medicijnkosten.nl/>
- <sup>9</sup> Zorginstituut Nederland <https://www.farmacotherapeutischkompas.nl/>

- 
- <sup>10</sup> Chaudhry SI, Khan RF, Chen J, Dharmarajan K, Dodson JA, Masoudi FA, Wang Y, Krumholz HM. National trends in recurrent AMI hospitalizations 1 year after acute myocardial infarction in Medicare beneficiaries: 1999-2010. *J Am Heart Assoc.* 2014;3(5):e001197.
- <sup>11</sup> NHG Standaard Stabiele Angina Pectoris <https://www.nhg.org/standaarden/volledig/nhg-standaard-stabiele-angina-pectoris>
- <sup>12</sup> Buntinx F, Knockaert D, Bruyninckx R, de Blaey N, Aerts M, Knottnerus JA, Delooz H. Chest pain in general practice or in the hospital emergency department: is it the same? *Fam Pract.* 2001;18(6):586-9.
- <sup>13</sup> Stevanovic, J. 2015. Pharmacoeconomics of cardiovascular disease prevention (Thesis); Chapter 3 Annex
- <sup>14</sup> Stevanovic J, Denee L, Koenders JM, Postma MJ. Incidence Description and Costs of Acute Heart Failure in the Netherlands. *Value Health.* 2014;17(7):A328.
- <sup>15</sup> Buisman LR, Tan SS, Koudstaal PJ, Nederkoorn PJ, Redekop WK. Hospital Costs Of Ischemic Stroke And Transient Ischemic Attack In The Netherlands. *Value Health.* 2014;17(7):A485.
- <sup>16</sup> NHG-Standaard Beroerte; <https://www.nhg.org/standaarden/volledig/nhg-standaard-beroerte#idp370016>
- <sup>17</sup> van Eeden M, van Heugten C van Maastricht GA, van Mierlo M, Visser-Meily JM, Evers SM. The burden of stroke in the Netherlands: estimating quality of life and costs for 1 year poststroke. *BMJ Open.* 2015;5(11):e008220.
- <sup>18</sup> NHG Standaard Perifeer Arterieel Vaatlijden. <https://www.nhg.org/standaarden/volledig/nhg-standaard-perifeer-arterieel-vaatlijden>
- <sup>19</sup> Prisma hospital statics 2007: length of stay peripheral vascular diseases: <http://cognosserver.prismanet.nl/cognos7/cgi-bin/ppdscgi.cgi?DC=Q&E=/Prisma-Landelijke-LMR/Landelijke+LMR-informatie+-+Verrichtingen>

- 
- <sup>20</sup> Meijer WT, Hoes AW, Rutgers D, Bots ML, Hofman A, Grobbee DE. Peripheral arterial disease in the elderly: The Rotterdam Study. *Arterioscler Thromb Vasc Biol.* 1998;18(2):185-92
- <sup>21</sup> Nederlandse Zorgautoriteit. <https://www.opendisdata.nl/>
- <sup>22</sup> de Groot S, Enters-Weijnen CF, Geelhoed-Duijvestijn PH, Kanter TA. A cost of illness study of hypoglycaemic events in insulin-treated diabetes in the Netherlands. *BMJ Open.* 2018;8(3):e019864.
- <sup>23</sup> Nederlands Oogheelkundig Gezelschap, Cataract Richtlijn 2013. [http://www.rep-online.nl/uploads/rF/KL/rFKLdha1Ep7d3kzBLv-MsA/Richtlijn\\_cataract\\_2013.pdf](http://www.rep-online.nl/uploads/rF/KL/rFKLdha1Ep7d3kzBLv-MsA/Richtlijn_cataract_2013.pdf)
- <sup>24</sup> De Vries NE, Laurendeau C, Lafuma A, Berdeaux G, Nuijts RM. Lifetime costs and effectiveness of ReSTOR compared with a monofocal IOL and Array-SA40 in the Netherlands. *Eye (Lond).* 2010;24(4):663-72.
- <sup>25</sup> Pezzullo L, Streatfeild J, Simkiss P, Shickle D. The economic impact of sight loss and blindness in the UK adult population. *BMC Health Serv Res.* 2018;18(1):63.
- <sup>26</sup> Marques AP, Macedo AF, Hernandez-Moreno L, Ramos PL, Butt T, Rubin G, Santana R; Portuguese visual impairment study group (PORVIS-group). The use of informal care by people with vision impairment. *PLoS One.* 2018;13(6):e0198631.
- <sup>27</sup> Kerr M, Rayman G, Jeffcoate WJ. Cost of diabetic foot disease to the National Health Service in England. *Diabet Med.* 2014;31(12):1498-504.
- <sup>28</sup> Zorginstituut Nederland [www.GIPdatabank.nl](http://www.GIPdatabank.nl)
- <sup>29</sup> Sint Maarten  
<http://decentrale.regelgeving.overheid.nl/cvdr/xhtmlloutput/actueel/Sint%20Maarten/142308.html>
- <sup>30</sup> Redekop WK, McDonnell J, Verboom P, Lovas K, Kalo Z. The cost effectiveness of Apligraf treatment of diabetic foot ulcers. *Pharmacoeconomics.* 2003;21(16):1171-83.
- <sup>31</sup> Richtlijn Diabetische voet  
[https://richtlijndatabase.nl/nieuws/richtlijn\\_diabetische\\_voet\\_beschikbaar.html](https://richtlijndatabase.nl/nieuws/richtlijn_diabetische_voet_beschikbaar.html)
